# Supplementary material for: Human cardiac myosin light chain 4 (MYL4) mosaic expression patterns vary by sex
Source: PubMed Central journal article supplement (PMC6722118; doi:10.1038/s41598-019-49191-0), 2019-09-03
Supplement: 41598_2019_49191_MOESM1_ESM.pdf [file 41598_2019_49191_MOESM1_ESM.pdf]

## **Supporting Information**

### **Human cardiac myosin light chain 4 (MYL4) mosaic expression patterns vary by sex**

Tony Y. Wang<sup>1</sup>, Dan E. Arking<sup>2</sup>, Joseph J. Maleszewski<sup>3</sup>, Karen Fox-Talbot<sup>1</sup>, Tim O. Nieuwenhuis<sup>1,2</sup>, Lakshmi Santhanam<sup>4</sup>, Renu Virmani<sup>5</sup>, Avi Z. Rosenberg, Marc K. Halushka<sup>1\*</sup>

1 Division of Cardiovascular Pathology, Department of Pathology, Johns Hopkins University SOM, Baltimore, MD, USA

2 McKusick-Nathans Institute of Genetic Medicine, Johns Hopkins University School of Medicine, Baltimore, MD, USA.

3 Department of Laboratory Medicine and Pathology, Mayo Clinic, Rochester, Minnesota, USA.

4 Department of Anesthesiology and Critical Care Medicine, Johns Hopkins University School of Medicine, Baltimore, MD, USA.

5 CVPath Institute, Gaithersburg, Maryland, USA.

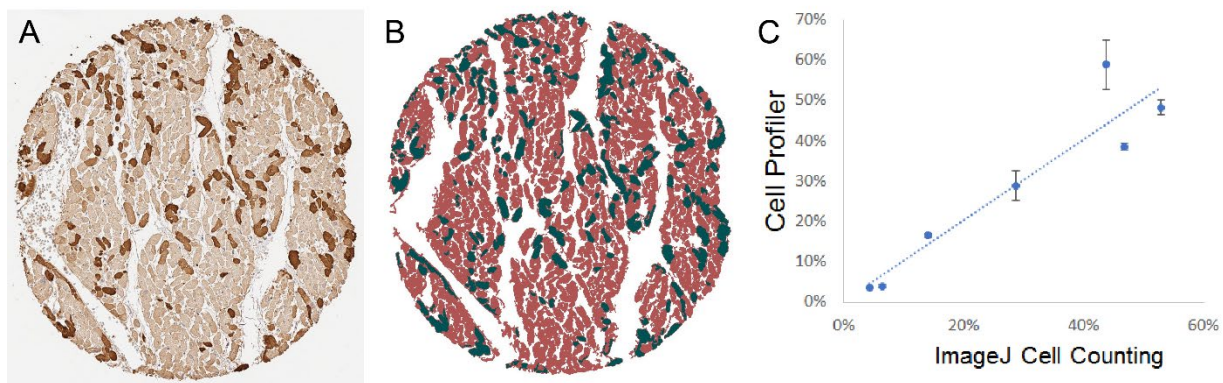

**Figure S1: Myocyte categorization using CellProfiler and ImageJ.** A) A typical cardiac core showing MYL4+ and MYL4- cells. B) A CellProfiler mask was generated to identify all cardiomyocytes (brown) and positive staining myocytes (green) at different intensity thresholds. An optimal threshold was selected in an operator-dependent fashion. C) A correlation of semi-automated CellProfiler and manual ImageJ Cell Counting methods accurately correlated ( $r=0.94$ ) with each other on the percent of MYL4+ cells to percent of brown pigmented area.

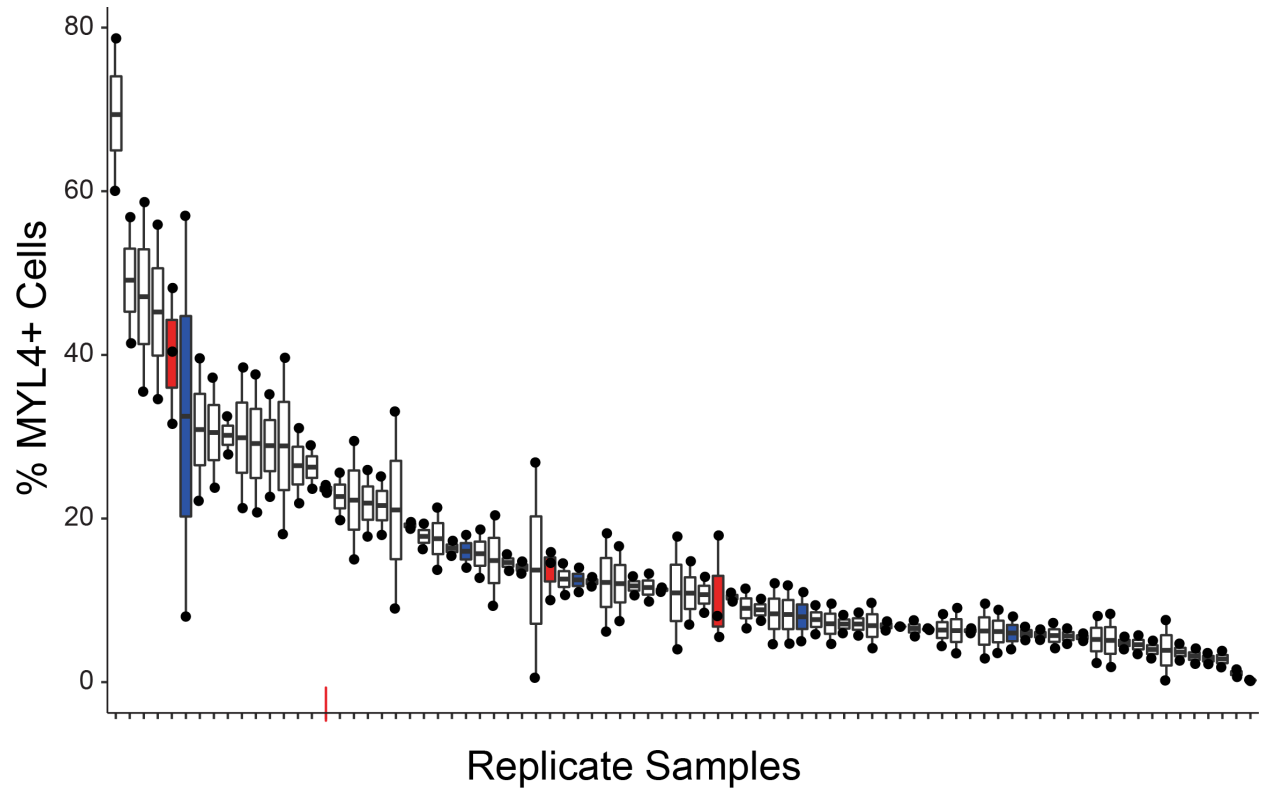

**Figure S2. Reproducibility of MYL4 percent positivity by subject.** Blue bars are septal – left ventricular comparisons and red bars are triplicate samples. The red line on the x axis indicates one of the triplicate samples.

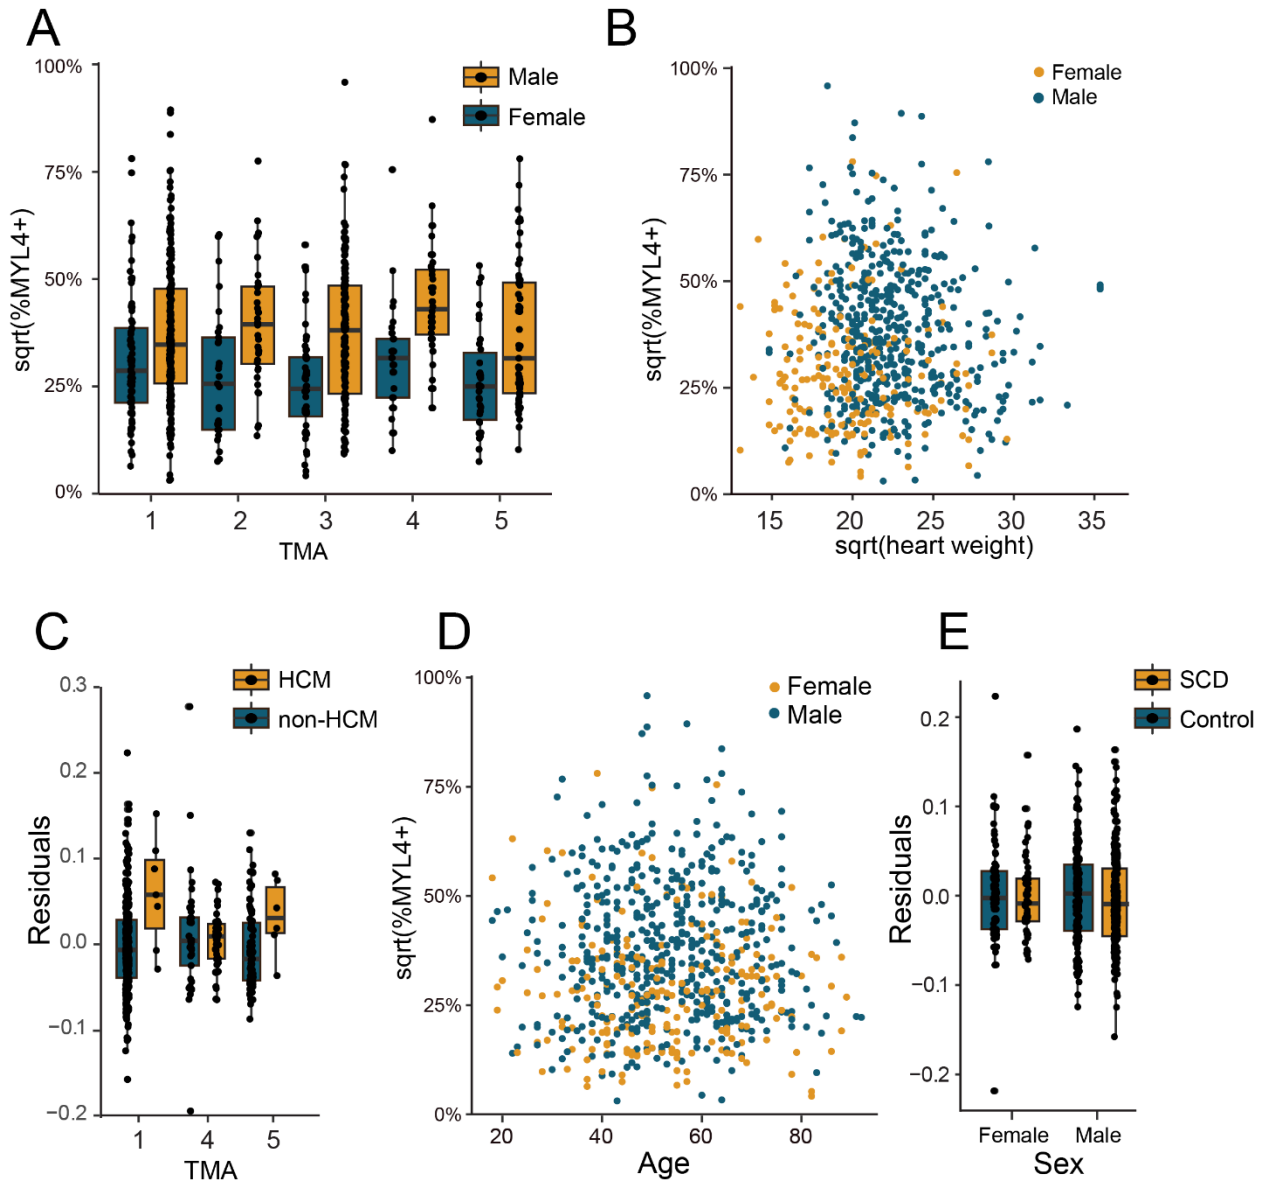

**Figure S3. MYL4 correlations by sex, heart weight, HCM status, age and SCD status. A)** In each TMA, male MYL4 positivity was increased independently. **B)** There was a significant increase in MYL4 positivity with heart weight ( $p= 4.52e-03$ ). **C)** Across all samples, HCM MYL4 positivity was increased over all non-HCM samples, but not significantly for septal tissues on TMA 4. **D)** The percent of MYL4+ cells was not related to subject age, when age >20 years. **E)** There was no overall correlation between MYL4 positivity and SCD in men or women.

|             | <b>Estimate</b> | <b>Std. Error</b> | <b>t. value</b> | <b>p.z</b> |
|-------------|-----------------|-------------------|-----------------|------------|
| (Intercept) | 0.30            | 0.21              | 14.28           | 0          |
| Age         | -0.00045        | 0.00036           | -1.23           | 0.29       |
| Sex         | 0.096           | 0.013             | 7.69            | 1.51e-14   |
| HCM         | 0.074           | 0.021             | 3.49            | 4.85e-04   |
| IHD         | 0.036           | 0.027             | 1.31            | 0.19       |
| DCM         | 0.011           | 0.025             | 0.44            | 0.66       |

**Table S1.** Linear mixed model evaluating TMAs 1-5 for age, sex, HCM, IHD and DCM.
